# Supplementary material
Source: PubMed Central journal article supplement (PMC150015)
Supplement: plntcell_15_3_583__1.pdf [file plntcell_15_3_583__1.pdf]

**Table 1.** Novel genes whose transcripts accumulated to at least two-fold higher levels in epidermal than in vascular tissues or total coleoptiles<sup>1</sup>

| EST clone no.<br>(contig no.) <sup>2</sup> | Accession no. | Relative expression levels<br>(ratio of signal intensities <sup>3</sup> ) |
|--------------------------------------------|---------------|---------------------------------------------------------------------------|
| 486019C07                                  | AI491598      | E>C (4.01)                                                                |
| 486020B11                                  | AI491648      | E>V (2.43)                                                                |
| 486020H10                                  | AI491699      | E>V (2.35)                                                                |
| 486041G12                                  | AI629902      | E>V (8.55)                                                                |
| 486047D05                                  | AI586565      | E>C (3.75)                                                                |
| 486047F07                                  | AI586567      | E>C (2.44)                                                                |
| 486049E11                                  | AI586613      | E>C (3.36)                                                                |
| 486051C06                                  | AI586452      | E>V (2.45)                                                                |
| 486066C08                                  | AI600630      | E>C (3.06)<br>E>V (3.19)                                                  |
| 486070G06                                  | AI600385      | E>C (2.61)                                                                |
| 486072B04                                  | AI600818      | E>C (3.42)                                                                |
| 486072D03                                  | AI600825      | E>C (2.21)                                                                |
| 486073D01                                  | AI619100      | E>C (2.25)                                                                |
| 486075B05                                  | AI600462      | E>C (2.36)                                                                |
| 486075B07                                  | AI600464      | E>C (2.87)                                                                |
| 486076H11                                  | AI600562      | E>C (2.20)                                                                |
| 486089G11                                  | AI615168      | E>V (4.55)                                                                |
| 486091H11                                  | AI619336      | E>C (2.74)                                                                |
| 486092A01                                  | AI621486      | E>C (2.99)                                                                |
| 486093B02                                  | AI619346      | E>C (2.61)                                                                |
| 486095E07                                  | AI615250      | E>C (2.22)                                                                |
| 496022B08                                  | AI973391      | E>V (2.56)                                                                |
| 496026D02                                  | AI974882      | E>V (5.28)                                                                |
| 603009D07 (6)                              | AI855174      | E>V (2.58)                                                                |
| 603010F04                                  | AI855228      | E>V (2.82)                                                                |
| 603024C11                                  | AI947586      | E>C (3.00)                                                                |
| 603032A11                                  | AI947981      | E>V (2.54)                                                                |
| 603036A12                                  | AI948123      | E>C (2.47)                                                                |
| 606021H07                                  | AI714875      | E>V (2.21)                                                                |
| 606022G05                                  | AI691623      | E>V (2.76)                                                                |
| 606025C02                                  | AI691183      | E>C (3.18)<br>E>V (3.46)                                                  |
| 606027D02                                  | AI715043      | E>C (2.17)<br>E>V (2.28)                                                  |

|                   |          |                           |
|-------------------|----------|---------------------------|
| 614028G09         | AW042451 | E>C (15.99)<br>E>V (3.37) |
| 614055D02         | AW065457 | E>V (4.22)                |
| 614058A04         | AW000126 | E>V (2.29)                |
| 614060F02         | AW065715 | E>V (2.88)                |
| 614064C06         | AW076179 | E>C (2.50)<br>E>V (3.45)  |
| 614067A04         | AW018111 | E>V (2.72)                |
| 614067B02 (5)     | AW090946 | E>V (4.58)                |
| 614070B12         | AW018229 | E>C (4.60)                |
| 614083A09         | AW055533 | E>C (2.97)<br>E>V (4.07)  |
| 614083C09         | AW120085 | E>V (12.70)               |
| 614086D02 (6)     | AW120189 | E>V (3.32)                |
| 614087B12         | AW059968 | E>C (2.85)                |
| 614087C05         | AW120242 | E>V (4.61)                |
| 614091F05         | AW146995 | E>V (2.06)<br>E>C (2.69)  |
| 614091G05         | AW091160 | E>C (2.18)                |
| 614102H10         | AW126565 | E>V (2.66)                |
| 618010E12         | AI901818 | E>C (2.56)                |
| 618045C10         | AI943763 | E>C (2.38)                |
| 687043F06         | AW331603 | E>C (2.78)                |
| 687063C03         | AW231360 | E>C (3.08)                |
| 707041G03         | AW331524 | E>V (5.14)                |
| 707061C06         | AW400059 | E>V (2.82)                |
| 707061E09         | AW400072 | E>C (2.45)                |
| 707083B04         | AW455616 | E>C (3.04)<br>E>V (6.04)  |
| 707083B11         | AW455619 | E>C (3.32)<br>E>V (4.53)  |
| 945029H08         | BE025529 | E>V (2.27)                |
| MEST23-C07        | BG841578 | E>V (2.76)                |
| MEST29-C07<br>(5) | BG842301 | E>V (2.65)                |
| MEST35-A03        | BG842004 | E>C (2.97)                |

<sup>1</sup> Significant difference ( $p < 0.05$ ) determined by one-tailed Student's t test

<sup>2</sup> ESTs with the same contig number cluster with CAP3 (Huang and Madan, 1999)

<sup>3</sup> N, blastn; X, blastx

<sup>4</sup> V, vascular tissues; C, coleoptiles; E, epidermal cells
