# Supplementary material
Source: PubMed Central journal article supplement (PMC150015)
Supplement: plntcell_15_3_583__2.pdf [file plntcell_15_3_583__2.pdf]

**Table 2.** Novel genes whose transcripts accumulated to at least two-fold higher levels in vascular tissues than in epidermal cells or total coleoptiles<sup>1</sup>

| EST clone no.<br>(contig no.) <sup>2</sup> | Accession no. | Relative expression levels<br>(ratio of signal intensities <sup>3</sup> ) |
|--------------------------------------------|---------------|---------------------------------------------------------------------------|
| 486028D06                                  | AI621917      | V>C <sup>4</sup> (10.01)<br>V>E (9.97)                                    |
| 486028G05                                  | AI621931      | V>E (3.53)<br>V>C (3.76)                                                  |
| 486030C02                                  | AI621979      | V>C (3.20)                                                                |
| 486030D03                                  | AI621986      | V>C (2.99)                                                                |
| 486040B05                                  | AI622315      | V>C (3.01)                                                                |
| 486040D03                                  | AI622336      | V>C (2.94)                                                                |
| 486053D01                                  | AI586648      | V>E (2.23)                                                                |
| 486064A11                                  | AI600278      | V>E (2.42)                                                                |
| 486068D12                                  | AI600774      | V>E (5.68)                                                                |
| 486082G03                                  | AI603725      | V>E (5.30)                                                                |
| 486088C03                                  | AI619227      | V>C (2.40)<br>V>E (5.83)                                                  |
| 486089G02                                  | AI615160      | V>C (2.67)                                                                |
| 486093F03                                  | AI619386      | V>C (2.81)                                                                |
| 496004D01                                  | AI637071      | V>C (2.44)                                                                |
| 496016G12                                  | AI966823      | V>E (3.93)                                                                |
| 496018A03                                  | AI966881      | V>C (2.84)                                                                |
| 496030F06                                  | AI974922      | V>E (2.10)                                                                |
| 496030F12                                  | AI974927      | V>C (2.31)                                                                |
| 603014H04                                  | AI855352      | V>E (2.91)                                                                |
| 603026E11                                  | AI947680      | V>C (2.60)                                                                |
| 603027H11                                  | AI947757      | V>E (3.25)<br>V>C (5.08)                                                  |
| 603034E08                                  | AI948095      | V>E (2.23)<br>V>C (2.97)                                                  |
| 603034E12                                  | AI948098      | V>E (3.30)                                                                |
| 603034H05                                  | AI948113      | V>E (3.43)                                                                |
| 603038F04                                  | AI948228      | V>C (2.72)                                                                |
| 603040A07                                  | AI964614      | V>C (2.42)<br>V>E (2.87)                                                  |
| 603043E01                                  | AI948353      | V>C (6.32)                                                                |
| 603043G04                                  | AI948365      | V>E (3.56)<br>V>C (5.32)                                                  |
| 606018B06                                  | AI691450      | V>C (2.21)                                                                |
| 606026C01                                  | AI714968      | V>E (3.12)                                                                |

|           |          |                           |
|-----------|----------|---------------------------|
| 606026D01 | AI714975 | V>C (2.37)                |
| 606026E02 | AI714985 | V>C (5.00)                |
| 606029C04 | AI734298 | V>C (4.63)                |
| 606029F04 | AI734323 | V>C (6.58)                |
| 606035E08 | AI734724 | V>C (2.94)                |
| 606037E10 | AI737222 | V>E (2.15)                |
| 606052E10 | AI770436 | V>E (2.96)                |
| 606053A04 | AI770463 | V>E (3.74)                |
| 606054G10 | AI770596 | V>E (2.71)                |
| 606059C06 | AI770849 | V>E (2.45)<br>V>C (3.43)  |
| 614002G12 | AI795752 | V>E (4.44)<br>V>C (5.76)  |
| 614006G06 | AI782944 | V>E (2.30)                |
| 614010A06 | AI783286 | V>E (2.61)<br>V>C (3.04)  |
| 614010D06 | AI783319 | V>E (2.29)                |
| 614038B07 | AI979612 | V>C (2.25)                |
| 614051D04 | AW065404 | V>E (2.62)                |
| 614066B02 | AW076355 | V>C (3.79)                |
| 614101C10 | AW155834 | V>E (2.74)<br>V>C (9.11)  |
| 618001A08 | AI901309 | V>C (3.62)                |
| 618009D12 | AI901709 | V>C (3.20)                |
| 618033D11 | AI941684 | V>C (5.64)                |
| 618036H08 | AI941949 | V>E (2.59)<br>V>C (5.65)  |
| 683014C06 | AW067034 | V>C (2.76)                |
| 687067A08 | AW231557 | V>C (2.69)                |
| 707034C08 | AW331055 | V>C (2.46)                |
| 707036G05 | AW324652 | V>C (26.54)               |
| 707037B03 | AW330590 | V>E (5.54)<br>V>C (7.58)  |
| 707041F03 | AW331515 | V>C (3.71)<br>V>E (4.06)  |
| 486028D06 | AI621917 | V>C (10.01)<br>V>E (9.97) |
| 707048A04 | AW331156 | V>C (2.27)                |
| 707050F08 | AW352513 | V>E (2.67)                |
| 707074G03 | AW438152 | V>C (4.03)<br>V>E (6.84)  |
| 707077C01 | AW438373 | V>C (2.92)                |

945033D04 BE056839 V>C (2.79)

MEST15-H12 BG841129 V>C (2.22)

MEST29-A03 BG842276 V>C (2.99)

---

<sup>1</sup> Significant difference ( $p < 0.05$ ) determined by one-tailed Student's t test

<sup>2</sup> ESTs with the same contig number cluster with CAP3 (Huang and Madan, 1999)

<sup>3</sup> N, blastn; X, blastx

<sup>4</sup> V, vascular tissues; C, coleoptiles; E, epidermal cells
